# Supplementary material
Source: PubMed Central journal article supplement (PMC5020368)
Supplement: aasm.39.10.1859s2.pdf [file aasm.39.10.1859s2.pdf]

## **Population-based GWAS samples and phenotype measurements**

The EARly Genetics and Lifecourse Epidemiology (EAGLE) Consortium is an international consortium of pregnancy and birth cohorts that aims to collaborate to investigate the genetic basis of phenotypes in antenatal and early life and childhood. EAGLE covers a broad range of pathways and phenotypes, integrating closely with the DOHaD (developmental origins of health and disease) community. Further details can be found here: <http://research.lunenfeld.ca/eagle/>. Descriptions for each cohort that participated in this study are detailed below. All participants provided written informed consent and studies were approved by local Research Ethics Committees and/or Institutional Review boards.

### ***Individual Study Cohort Descriptions***

#### *Amsterdam Born Children and their Development (ABCD)*

##### *Study design*

The Amsterdam Born Children and their Development (ABCD) cohort study is a large, community-based birth cohort, which started in 2003 with the inclusion of 8,000 pregnant women living in Amsterdam and its main aim is to study factors in early life (during pregnancy and infancy) that explain health later in life. Detailed information on life style habits, psychosocial determinants, obstetric complications, blood pressure course during pregnancy, as well as childhood growth patterns has been gathered.<sup>1</sup> Data for this study comes from ABCD-Genetic Enrichment (ABCD-GE) study, a sub-study of 1192 ethnic Dutch children. The blood was collected from a simple finger prick during the 5-year health check-up of the children (2008-2010). DNA was extracted from the dried blood spots.<sup>2</sup> Approval of the study was obtained from the Central Committee on Research Involving Human Subjects in The Netherlands, the medical

ethics review committees of the participating hospitals and the Registration Committee of the Municipality of Amsterdam and written consent was obtained from participating parents.

#### *Sleep duration assessment*

At age 7-8, child sleep and sleep problems were assessed using the Dutch Child Sleep Habit Questionnaire<sup>3</sup>. To assess sleep duration, mothers were asked on “Child’s usual amount of sleep each day, combining night time sleep and naps (in hours)”.

#### *Avon Longitudinal Study of Parents and Children (ALSPAC)*

##### *Study design*

The Avon Longitudinal Study of Parents and Children (ALSPAC) is a prospective study, which recruited pregnant women with expected delivery dates between April 1991 and December 1992 from Bristol UK. The study methods are described elsewhere and on the study website ([www.alspac.bris.ac.uk](http://www.alspac.bris.ac.uk)).<sup>4</sup> Ethical approval for the study was obtained from the ALSPAC Ethics and Law Committee and the Local Research Ethics Committees.

##### *Sleep duration assessment*

Sleep duration in children was assessed by parental questionnaire according to the following open-ended question: “Normally during term-time what time in the evening does your child go to sleep? During term-time what time does she normally wake-up in the morning?” These questions were to be answered for school days and weekends separately. Sleep duration in school days was used in this study.

## Brain development and Air pollution ultrafine particles in school children (**BREATHE**)

### *Study design*

The BRain dEvelopment and Air polluTion ultrafine particles in scHool children (BREATHE) is a prospective cohort study that aims to analyze the association between air pollution and cognitive development of scholars.<sup>5</sup> DNA samples from 2,492 children were obtained from saliva and a final subset of 1,778 children was selected for genome-wide genotyping after applying a filtering criteria (low quality DNA, no neuropsychological data, non-Caucasian descent origin and not born in Spain, parents born in Europe, and adopted children). Genome-wide genotyping was performed at the Spanish National Genotyping Centre (CEGEN) coordinated by the Spanish National Cancer Research Centre (CNIO). All parents and legal guardians signed the informed consent approved by the Ethical Committee of the IMIM-ParcSalut Mar.

### *Sleep duration assessment*

Child sleep duration was assessed by parental questionnaire according to the following open-ended question: “How long does your child sleep during weekdays?”

## Generation R Study (**GEN-R**)

### *Study design*

The Generation R Study is a population-based prospective cohort study. All children were born between April 2002 and January 2006. This study is designed to identify early environmental and genetic determinants predictors of growth, development, and health from foetal life until young adulthood and has been described previously in detail.<sup>6</sup> DNA was extracted from cord blood taken at birth. Children of Northern European descent, as determined by principal

component analyses of genome wide association (GWA) data, were selected. The details of DNA extraction, genotyping, imputation, and quality control have been previously described.<sup>7</sup> Of 5,908 children with DNA available, 1,979 children of Northern European descent (52% boys) had SNP data and available data on sleep duration. The Medical Ethical Committee of the Erasmus Medical Centre, Rotterdam has approved the study protocol, and participants have given informed consent in writing.

#### *Sleep duration assessment*

Sleep duration in children was assessed by parental questionnaire at 24 months. Average sleep duration of children per 24 hours was estimated by the number of sleeping hours during both day and night. Detailed information on phenotype are published elsewhere.<sup>8</sup>

#### *Glycyrrhizin in Licorice (GLAKU)*

##### *Study design*

Glaku is an urban community-based cohort comprising 1049 healthy, singleton infants born between March and November 1998 in Helsinki, Finland. In 2009–2011, all initial cohort members who had given permission to be contacted and whose addresses were traceable ( $N=920$ , 87.7% of the original cohort in 1998) were invited to a follow-up; 692 (75.2%) mothers of the adolescent invitees could be contacted by phone. Of them, 451 (65.2% of those who could be contacted by phone, 49% of the invited) participated in a follow-up at a mean age of 12.3 years ( $SD=0.5$ , range 11.0–13.2 years) and 393 gave saliva and 211 blood for genetic analyses. In 277 participants DNA was extracted from saliva and in 80 participants from leukocytes. After quality control procedures 352 samples remained for the analyses. Data on sleep duration at an average age of 11.9 ( $SD=1.3$ ) were available in 321 ( $n=165$ , 51.4% girls) of those genotyped

successfully. Detailed information on the selection of the Glaku participants and on the study design can be found elsewhere.<sup>9-11</sup> Ethics Committees of the City of Helsinki Health Department and Children's Hospital in Helsinki University Central Hospital approved the study protocol. Written informed consent was obtained from parent/guardian and child.

#### *Sleep duration assessment*

Sleep duration was parent-reported and calculated as the arithmetic difference from answers to questions “What time does your child go to sleep on schooldays?” (before 19.00/ 19.30/ 20.00/ 20.30/ 21.00/ 21.30/ 22.00/ 22.30/ 23.00/ 23.30/ 24.00/ 00.30/ 01.00/ 01.30/ 02.00 or later) and “What time does your child wake up on school mornings?” (before 05.00/ 05.30/ 06.00/ 06.30/ 07.00/ 07.30/ 08.00 or later).

#### *Lifestyle-Immune System- Allergy Study and German Infant Study on the Influence of Nutrition*

##### *Intervention (LISA+GINI)*

##### *Study design*

The “influence of Life-style factors on the development of the Immune System and Allergies in East and West Germany PLUS the influence of traffic emissions and genetics” (LISAplus) Study is a population based birth cohort study. A total of 3,097 healthy, mature (gestational age over 37 weeks) neonates with a birth weight over 2500g were recruited between 1997 and 1999 in Munich, Leipzig, Wesel and Bad Honnef. A total of 5,991 mothers and their newborns were recruited into the German Infant study on the influence of Nutrition Intervention (GINI) between September 1995 and June 1998 in Munich and Wesel. Detailed descriptions of the LISA and GINI studies have been published elsewhere.<sup>12, 13</sup> For both studies, approval by the local Ethics Committees and written consent from participant's families were obtained.

### *Sleep duration assessment*

Child sleep duration was assessed by parental questionnaire according to the following open-ended question: “How many hours does your child sleep on average: In total, number hours per day and night.”

### *Infancia y media ambiente project (INMA)*

#### *Study design*

The INMA—INfancia y Medio Ambiente—(Environment and Childhood) Project is a network of birth cohorts in Spain that aim to study the role of environmental pollutants in air, water and diet during pregnancy and early childhood in relation to child growth and development.<sup>14</sup> Data for this study comes from INMA Sabadell, INMA Valencia and INMA Menorca. DNA was obtained from cord blood, whole blood or saliva collected at 4years using the Chemagen protocol at the Spanish National Genotyping Centre (CEGEN). Children whose parents reported to be white and to be born in Spain or in European countries and that were not lost during the follow-up were selected for genotyping. The study has been approved by Ethical Committee of each participating centre and written consent was obtained from participating parents.

### *Sleep duration assessment*

Child sleep and sleep-related habits were assessed by parental questionnaires. To assess sleep duration, parents were asked to reply to the following open-ended question: “How long does the child sleep per day, including naps (in hours)?”.

**Table S1:** Information on genotyping methods, quality control, imputation and statistical analysis of studies included in GWAS meta-analysis of sleep duration in children

| Cohort    | Genotyping and QC                                   |                               |         |                   |           |                       |                             | Imputation and analysis |                       | Meta-level QC  |                |            |        |      |
|-----------|-----------------------------------------------------|-------------------------------|---------|-------------------|-----------|-----------------------|-----------------------------|-------------------------|-----------------------|----------------|----------------|------------|--------|------|
|           | Platform                                            | Caling algorithm              | MAF (%) | SNP call rate (%) | P for HWE | Sample call rate (%)* | Final N SNPs                | Imputation              | Analysis software     | Initial N SNPs | Final N SNPs** | % filtered | lambda | N    |
| ABCD      | llumina HumanCoreBeadChip                           | Genome Studio                 | >1      | >95               | >10e-6    | >97                   | 277,644                     | IMPUTE2 <sup>15</sup>   | SNPTEST <sup>16</sup> | -              | -              | -          | -      | 929  |
| ALSPAC    | llumina 550K                                        | GenCall                       | >1      | >97               | >10e-7    | >97                   | 488,325                     | MACH <sup>17</sup>      |                       | 30,061,895     | 8,320,472      | 27.68%     | 1.01   | 5434 |
| BREATHE   | llumina HumanCoreBeadChip                           | GeneTrain2.0                  | >1      | >95               | >10e-6    | >97                   | 240,103                     | IMPUTE2                 | SNPTEST               | 37,721,381     | 6,885,016      | 18.25%     | 1.00   | 1593 |
| GEN-R     | llumina Human 610K & 660W                           | Genome Studio                 | ≥0.1    | >97.5             | >10e-7    | >97.5                 | 518,245                     | MACH                    | GRIMP <sup>18</sup>   | 30,072,738     | 6,890,910      | 22.91%     | 1.00   | 1979 |
| GLAKU     | llumina Human Omni Express Exome 1.2 bead chip      | -                             | >0      | >99               | >0.005    | -                     |                             | IMPUTE2                 | SNPTEST               | -              | -              | -          | -      | 321  |
| INMA      | llumina HumanOmni1-Quad Beadchip                    | GeneTrain2.0                  | >1      | >95               | >10e-6    | >98                   | 817,131                     | IMPUTE                  | SNPTEST               | 38,040,556     | 6,275,820      | 16.50%     | 1.00   | 940  |
| LISA+GINI | Affymetrix Genome-Wide Human SNO Arrays 5.0 and 6.0 | BRLMM-P (5.0) BIRSEEDv2-(6.0) | >1      | >95               | >10e-5    | >95                   | 351,488 (5.0) 718,039 (6.0) | IMPUTE                  | SNPTEST               | 13,486,809     | 5,306,521      | 39.35%     | 1.00   | 608  |

\*In addition samples were checked for excess of heterozygosity, sex discordances, relatedness and population stratification

\*\*filtered by MAF>1% EMAC (expected allele count)>100, imputation quality R2>0.3 or INFO>0.4

**Figure S1.** P-Z plots (x-axis: reported p values on  $-\log_{10}$  scale, y-axis: p-values calculated from the Z-statistics on  $-\log_{10}$  scale, using the reported beta estimates and standard errors) for each study participating in the GWAS meta-analysis of sleep duration in children ( $N=10,554$ ). No major analytical issues with beta's, standard errors and p-values were identified (concordance with the identity line)

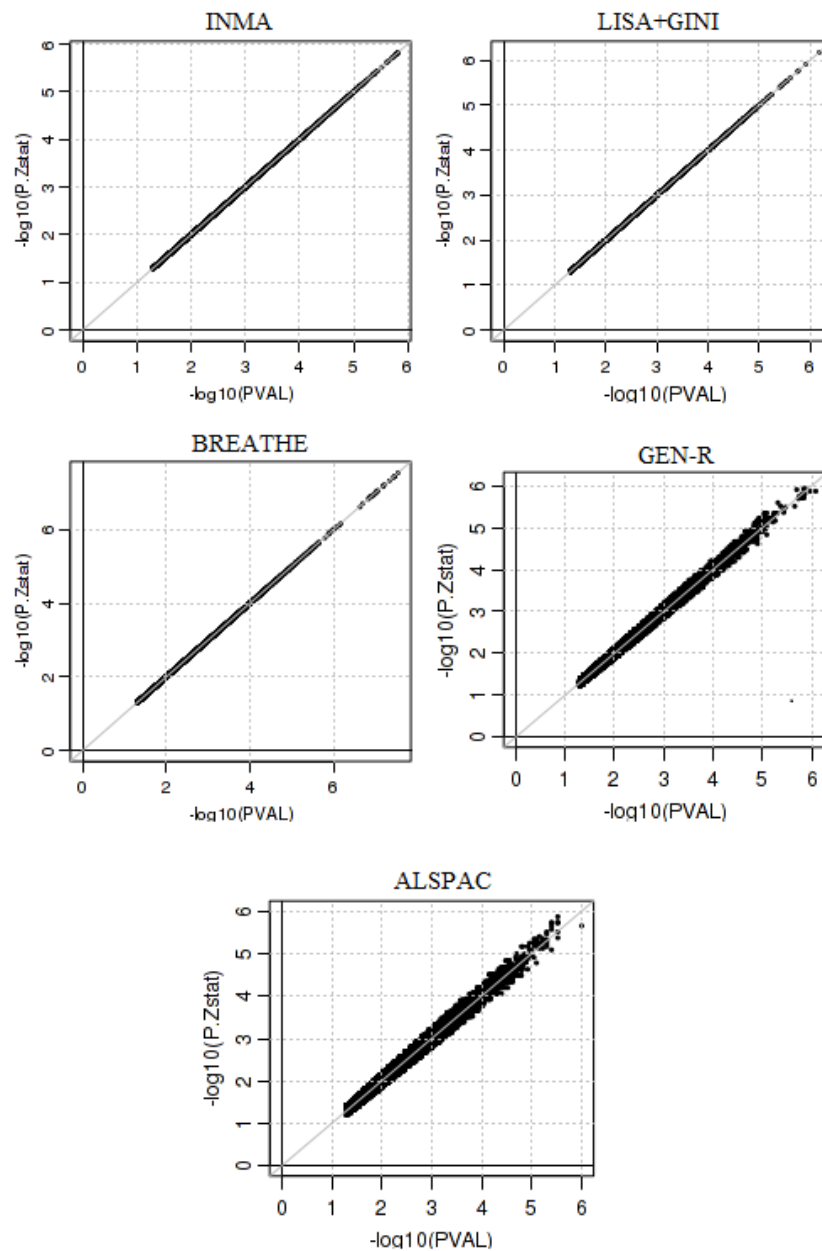



**Figure S2.** Effect allele frequency (EAF) plot reporting study specific allele frequencies against allele frequencies expected from 1000 Genome (EUR), for studies participating in the GWAS meta-analysis of sleep duration in children ( $N=10,554$ ). SNPs with deviating allele frequencies (red dots) were excluded from further analyses. They are mainly variants named MERGED in the 1000G as well as array specific variants.

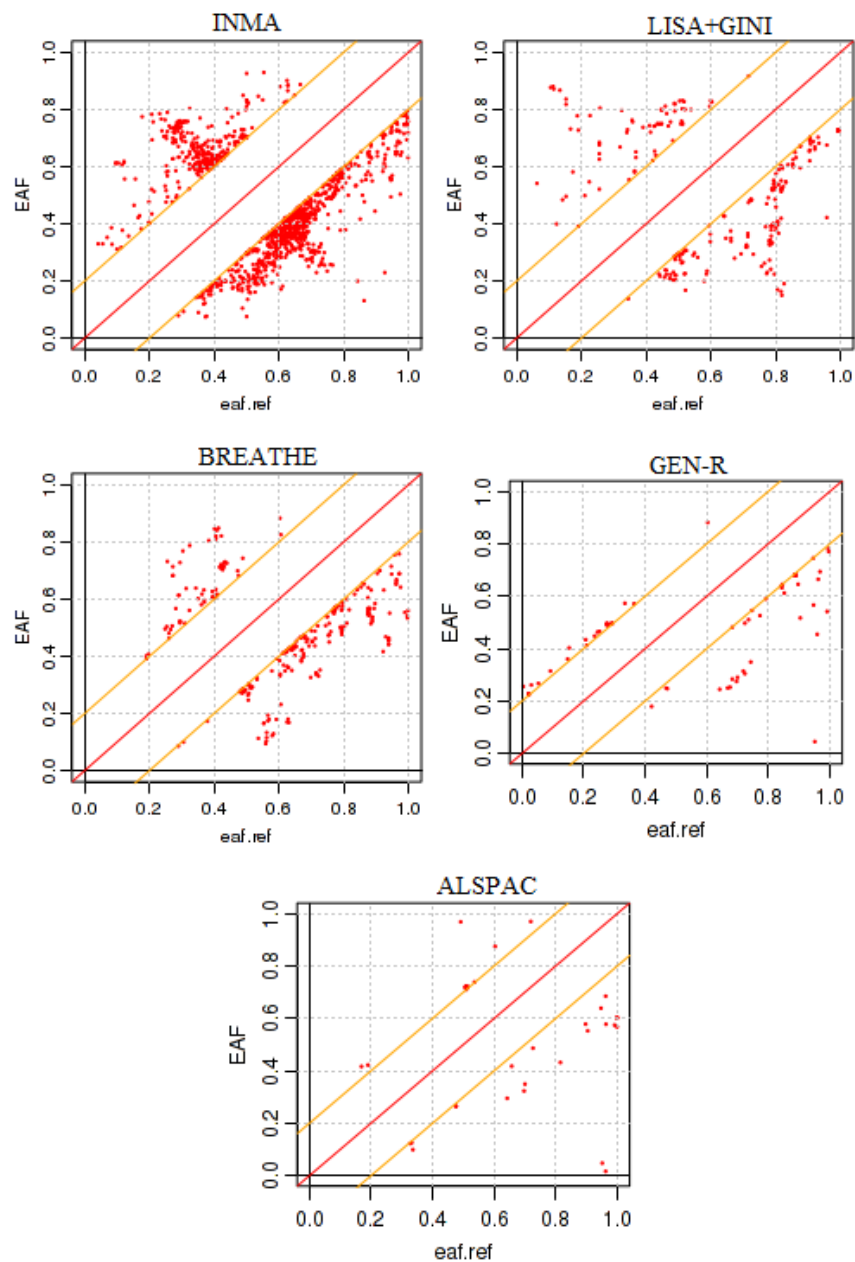

**Table S2.** Results of all suggestive hits ( $p < 1.00e-05$ ) from GWAS meta-analysis on sleep duration in the discovery phase, BMI adjusted model ( $N = 10,502$ )

| SNP              | Chr       | Position        | Allele 1/2 | Frequency 1 | Effect (SE)         | Direction <sup>a</sup> | # hits   | meta p          | heterogeneity $p^b$ | Nearest gene |
|------------------|-----------|-----------------|------------|-------------|---------------------|------------------------|----------|-----------------|---------------------|--------------|
| <b>rs7121351</b> | <b>11</b> | <b>72698114</b> | <b>A/G</b> | <b>0.89</b> | <b>-0.08 (0.01)</b> | <b>-----</b>           | <b>9</b> | <b>2.29e-08</b> | <b>.24</b>          | <b>ARAP1</b> |
| rs35630915       | 1         | 23180489        | A/G        | 0.19        | 0.07 (0.01)         | -----                  | 74       | 3.08e-07        | .50                 | LUZP1        |
| rs157274         | 3         | 137813539       | T/C        | 0.49        | -0.04 (0.01)        | -----                  | 1        | 1.16e-06        | .20                 | SOX14        |
| rs9819008        | 3         | 39581           | T/C        | 0.86        | -0.09 (0.02)        | ----?                  | 2        | 1.18e-06        | .21                 | LOC642891    |
| chr12:73456456:I | 12        | 73456456        | D/I        | 0.72        | -0.10 (0.02)        | ?-?-?                  | 1        | 1.54e-06        | .46                 | NA           |
| chr6:23513559:D  | 6         | 23513559        | D/I        | 0.21        | -0.11 (0.02)        | ?-?-?                  | 3        | 1.62e-06        | .58                 | NA           |
| rs1230545        | 7         | 52725576        | A/C        | 0.20        | 0.05 (0.01)         | +++?+                  | 2        | 1.81e-06        | .86                 | LOC100131871 |
| rs77543094       | 19        | 17644050        | A/T        | 0.91        | 0.09 (0.02)         | +++?                   | 3        | 1.86e-06        | .13                 | FAM129C      |
| rs60198202       | 9         | 28374228        | A/G        | 0.51        | -0.04 (0.01)        | ----+                  | 19       | 1.98e-06        | .15                 | LINGO2       |
| chr2:226028285:D | 2         | 226028285       | D/I        | 0.56        | 0.09 (0.02)         | ?+?++                  | 3        | 3.52e-06        | .42                 | NYAP2        |
| rs143415644      | 12        | 104391449       | T/C        | 0.05        | 0.09 (0.02)         | +++??                  | 2        | 3.60e-06        | .53                 | GLT8D2       |
| rs12539717       | 7         | 47322289        | T/C        | 0.70        | -0.05 (0.01)        | -----                  | 12       | 3.77e-06        | .78                 | TNS3         |
| rs190524676      | 15        | 75716731        | T/G        | 0.90        | 0.10 (0.02)         | ++++?                  | 1        | 4.25e-06        | .67                 | SIN3A        |
| rs272021         | 2         | 115886612       | A/G        | 0.27        | 0.06 (0.01)         | +++?+                  | 1        | 4.73e-06        | .18                 | DPP10        |
| rs4509077        | 5         | 133888303       | A/C        | 0.34        | -0.04 (0.01)        | -----                  | 1        | 5.68e-06        | .92                 | FSTL4        |
| rs4791184        | 17        | 67741686        | T/C        | 0.22        | -0.07 (0.02)        | -----                  | 2        | 7.47e-06        | .17                 | NOL11        |
| rs7824578        | 8         | 8879193         | A/T        | 0.10        | -0.09 (0.02)        | ----?                  | 1        | 7.54e-06        | .98                 | MFHAS1       |
| rs72788412       | 16        | 48650645        | C/G        | 0.13        | -0.06 (0.01)        | -----                  | 1        | 9.18e-06        | .51                 | LOC105371240 |

Note: Chr= chromosome, NA, ?=not available

<sup>a</sup>order of participating cohorts: ALSPAC, GEN-R, LISA+GINI, INMA, BREATHE

<sup>b</sup> $p$  value showing heterogeneity between the cohorts

**Table S3a.** Results of the replication analysis of the top SNP (rs74506765, chromosome 11q13.4) derived from the GWAS meta-analysis on sleep duration in children (discovery phase)

| <b>Cohort</b> | <b>Allele 1/2</b> | <b>Frequency 1</b> | <b>Effect</b> | <b>SE</b> | <b>p-value</b> | <b>N</b> |
|---------------|-------------------|--------------------|---------------|-----------|----------------|----------|
| <b>ABCD</b>   | C/G               | 0.08               | 0.01          | 0.08      | 0.95           | 929      |
| <b>GLAKU</b>  | C/G               | 0.04               | -0.27         | 0.11      | 0.015          | 321      |

**Table S3b.** Results of the replication analysis of proxies to the top SNP (rs74506765, chromosome 11q13.4) derived from the GWAS meta-analysis on sleep duration in adults (summary statistics available by Gottlieb et al, 2014<sup>19</sup>)

| <b>SNP</b> | <b>Chr</b> | <b>Position</b> | <b>Allele1/2</b> | <b>Frequency 1</b> | <b>RSquared*</b> | <b>Effect</b> | <b>SE</b> | <b>p-value</b> | <b>N</b> |
|------------|------------|-----------------|------------------|--------------------|------------------|---------------|-----------|----------------|----------|
| rs7121351  | 11         | 72698114        | A/G              | 0.84               | 0.93             | 0.02          | 0.01      | 0.07           | 38,398   |
| rs10898869 | 11         | 72720908        | T/C              | 0.08               | 0.85             | 0.07          | 0.06      | 0.25           | 3,574    |
| rs10751211 | 11         | 72694178        | T/C              | 0.23               | 0.53             | -0.02         | 0.01      | 0.14           | 38,394   |
| rs1157343  | 11         | 72718096        | A/G              | 0.35               | 0.21             | -0.01         | 0.01      | 0.47           | 38,417   |

\*it refers to the LD threshold with the top SNP (rs74506765)

**Table S4.** Enriched tissues/cell types identified with DEPICT associated with sleep duration in children (only nominally associated shown)

| MeSH term                   | Name                    | MeSH first level term | MeSH second level term | <i>p</i> | FDR    |
|-----------------------------|-------------------------|-----------------------|------------------------|----------|--------|
| A10.165.450                 | Granulation Tissue      | Tissues               | Connective Tissue      | 0.05     | > 0.20 |
| A10.165.450.300             | Cicatrix                | Tissues               | ConnectiveTissue       | 0.05     | > 0.20 |
| A05.360.319.114.630.535     | Ovarian Follicle        | Urogenital System     | Genitalia              | 0.05     | > 0.20 |
| A11.436.329                 | Granulosa Cells         | Cells                 | Epithelial Cells       | 0.05     | > 0.20 |
| A06.407.312.497.535.300.500 | Cumulus Cells (ovarian) | Endocrine System      | Endocrine Glands       | 0.05     | > 0.20 |

Note: MeSH term= Medical Subject Headings term, FDR= False Discovery Rate

**Table S5.** Top 10 enriched gene-sets identified with DEPICT

| Original gene set ID        | Original gene set description              | <i>p</i> | FDR    |
|-----------------------------|--------------------------------------------|----------|--------|
| MP:0004984                  | increasedosteoclastcellnumber              | 6.60E-06 | > 0.20 |
| MP:0008088                  | abnormal T-helper 1 cell differentiation   | 7.52E-06 | > 0.20 |
| ENSG00000160007             | ARHGAP35 PPI subnetwork                    | 7.44E-05 | > 0.20 |
| ENSG00000162407             | PPAP2B PPI subnetwork                      | 7.55E-05 | > 0.20 |
| ENSG00000162909             | CAPN2 PPI subnetwork                       | 8.70E-05 | > 0.20 |
| ENSG00000100811             | YY1 PPI subnetwork                         | 1.39E-04 | > 0.20 |
| ENSG00000106123             | EPHB6 PPI subnetwork                       | 1.50E-04 | > 0.20 |
| GO:0030888                  | regulation of B cell proliferation         | 2.49E-04 | > 0.20 |
| ENSG00000115392             | FANCL PPI subnetwork                       | 3.25E-04 | > 0.20 |
| REACTOME_SIGNAL_ATTENUATION | Attenuation of insulin receptor signalling | 3.71E-04 | > 0.20 |

Note: FDR= False Discovery Rate

**Figure S3.** Manhattan plot of the GWAS meta-analysis of sleep duration in children for the BMI adjusted model ( $N=10,502$ ). The x-axis represents the autosomal chromosomes and the y-axis represents the  $-\log_{10}(p)$ . The red line indicates genome-wide significance ( $p=5.00e-08$ ) and the blue line indicates suggestive genome-wide significance ( $p=1.00e-05$ )

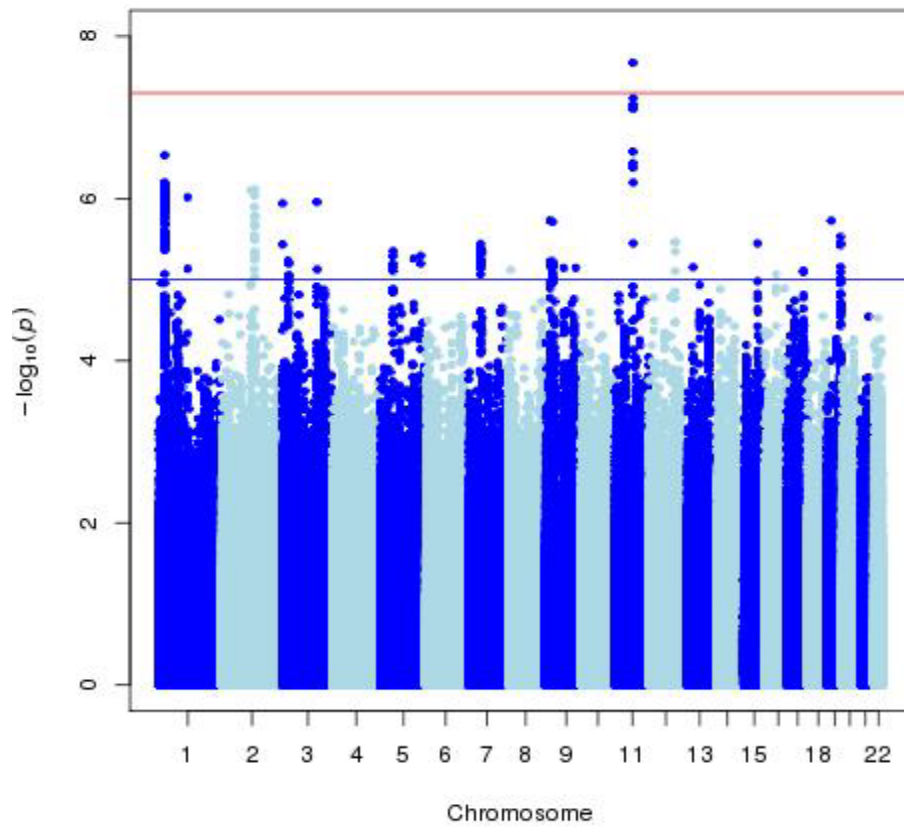

**Figure S4.** Quantile-quantile (QQ) plot showing the probability values from GWAS meta-analysis of sleep duration for the BMI adjusted model ( $N=10,502$ ). The red line indicates the distribution under the null hypothesis and the shaded area indicates the 95% confidence band

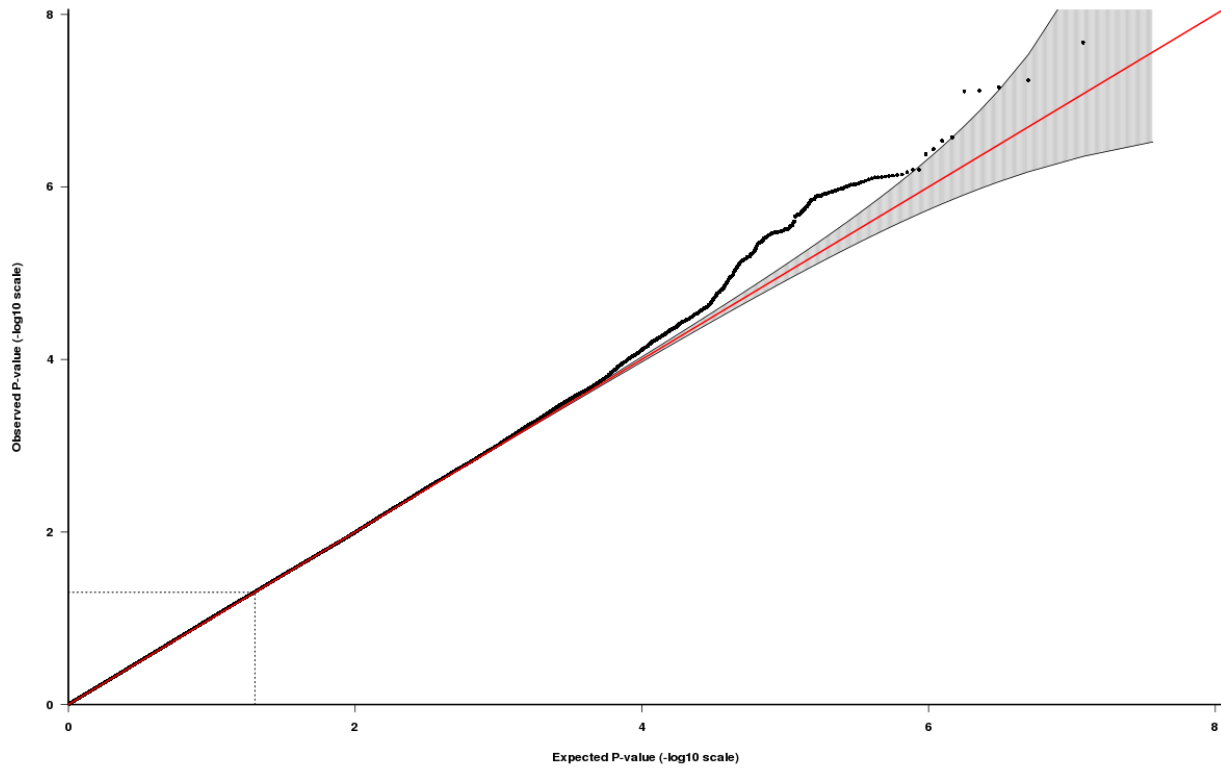

**Table S6.** Genetic correlations between sleep duration in children (derived from the GWAS summary statistics of the current study, under the BMI adjusted model) and common metabolic and psychiatric traits, using LD score regression and GWAS summary statistics data available in the literature

| Traits                                     | N             | Sleep duration in children |             |
|--------------------------------------------|---------------|----------------------------|-------------|
|                                            |               | $r_G$ (se)                 | p           |
| Sleep duration (adults) <sup>19</sup>      | 47,180        | .15 (0.17)                 | 0.37        |
| <i>Metabolic</i>                           |               |                            |             |
| Obesity (children) <sup>20</sup>           | 13,848        | .06 (0.11)                 | 0.60        |
| Type 2 diabetes (adults) <sup>21</sup>     | <b>69,033</b> | <b>.23 (0.11)</b>          | <b>0.04</b> |
| 2hrs glucose (adults) <sup>22</sup>        | 46,186        | .38 (0.22)                 | 0.09        |
| <i>Psychiatric</i>                         |               |                            |             |
| bipolar disorder (adults) <sup>23</sup>    | 16,731        | .05 (0.14)                 | 0.74        |
| major depression (adults) <sup>24</sup>    | 18,759        | .05 (0.17)                 | 0.79        |
| schizophrenia (adults) <sup>25</sup>       | 70,100        | -.05 (0.11)                | 0.63        |
| ADHD (children/family trios) <sup>26</sup> | 3,351         | .42 (0.26)                 | 0.12        |



## **Cohort Acknowledgements**

### *Amsterdam Born Children and their Development (ABCD)*

The ABCD study has been supported by grants from The Netherlands Organisation for Health Research and Development (ZonMW) within the programme Electromagnetic Fields and Health Research under grant numbers 85600004 and 85800001 and The Netherlands Heart Foundation. Genotyping was funded by the BBMRI-NL grant CP2013-50. Dr M.H. Zafarmand was supported by BBMRI-NL (CP2013-50). Dr. T.G.M. Vrijkotte was supported by ZonMW (TOP 40-00812-98-11010). We thank all participating hospitals, obstetric clinics, general practitioners and primary schools for their assistance in implementing the ABCD study. We also gratefully acknowledge all the women and children who participated in this study for their cooperation.

### *Avon Longitudinal Study of Parents and Children (ALSPAC)*

We are extremely grateful to all the families who took part in this study, the midwives for their help in recruiting them, and the whole ALSPAC team, which includes interviewers, computer and laboratory technicians, clerical workers, research scientists, volunteers, managers, receptionists and nurses. The UK Medical Research Council and the Wellcome Trust (Grant ref: 102215/2/13/2) and the University of Bristol provide core support for ALSPAC. Dr. G. Davey was supported by MRC Integrative Epidemiology Unit at the University Bristol, grant number MC\_UU\_12013/1. GWAS data was generated by Sample Logistics and Genotyping Facilities at the Wellcome Trust Sanger Institute and LabCorp (Laboratory Corporation of America) using support from 23andMe.

*Brain development and Air pollution ultrafine particles in school children (BREATHE)*

The research leading to these results has received funding from the European Research Council under the ERC Grant Agreement number 268479 – the BREATHE project. We are acknowledged with all the families participating into the study for their altruism and particularly to the schools Antoni Brusi, Baloo, Betània – Patmos, Centre d'estudis Montseny, Collegi Shalom, Costa i Llobera, El sagrer, ElsLlorers, Escola Pia de Sarrià, Escola Pia Balmes, Escola concertada Ramon Llull, Escola Nostra Sra. de Lourdes, Escola Tècnica Professional del Clot, Ferran i Clua, FrancescMacià, Frederic Mistral, Infant Jesús, Joan Maragall, Jovellanos, La Llacuna del Poblenou, Lloret, Menéndez Pidal, Nuestra Señora del Rosario, Miralletes, Ramon Llull, Rius i Taulet, Pau Vila, Pere Vila, Pi d' en Xandri, Projecte, Prosperitat, Sant Ramon Nonat - SagratCor, Santa Anna, Sant Gregori, Sagrat Cor Diputació, Tres Pins, Tomàs Moro, Torrent d'enMelis, Virolai. Dr. N. Vilor-Tejedor is funded by a pre-doctoral grant from the Agència de Gestió d'Ajuts Universitaris i de Recerca (2015 FI\_B 00636), Generalitat de Catalunya.

*Generation R Study (GEN-R)*

The Generation R Study is conducted by the Erasmus Medical Center in close collaboration with the Erasmus University Rotterdam, School of Law and Faculty of Social Sciences, the Municipal Health Service Rotterdam area, Rotterdam, the Rotterdam Homecare Foundation, Rotterdam, and the Stichting Trombosedienst &Artsenlaboratorium Rijnmond (STAR), Rotterdam. We gratefully acknowledge the contribution of general practitioners, hospitals, midwives and pharmacies in Rotterdam. The first phase of the Generation R Study is made possible by financial support from: Erasmus Medical Centre, Rotterdam, Erasmus University Rotterdam and the

Netherlands Organization for Health Research and Development (ZonMw). Dr. Irene Pappa was supported by an Erasmus University grant to Marinus H. van IJzendoorn. H. Tiemeier, MD, PhD was supported by NOW-ZonMW VIDI (Grant No.017.106.370). M.H. van IJzendoorn, PhD and M.J. Bakermans-Kranenburg, PhD were supported by the Dutch Ministry of Education, Culture, and Science and the Netherlands Organization for Scientific Research (Gravitation program, SPINOZA, VICI). Viara Mileva-Seitz, PhD was supported by NWO RUBICON prize no 446-11-023. M.J. Bakermans-Kranenburg, PhD H. Tiemeier, MD, PhD, and M.H. van IJzendoorn, PhD are members of the Consortium on Individual Development which is funded through the Gravitation program of the Dutch Ministry of Education, Culture, and Science and the Netherlands Organization for Scientific Research (NWO grant number 024.001.003)

*Glycyrrhizin in Licorice (GLAKU)*

The study has been supported by Academy of Finland, University of Helsinki, Finnish Foundation for Pediatric Research, Sigrid Juselius Foundation, Jalmari and Rauha Ahokas Foundation, Signe and Ane Gyllenberg Foundation, Yrjo Jahnsson Foundation, Juho Vainio Foundation, Emil Aaltonen Foundation, and Ministry of Education and Culture, Finland. The 352 samples were genotyped at the Genotyping and Sequencing Core Facility of the Estonian Genome Centre, University of Tartu.

*Lifestyle-Immune System- Allergy Study and German Infant Study on the Influence of Nutrition Intervention (LISA+GINI)*

The authors thank all families for participation in the studies and the LISApplus and GINIplus study teams for their excellent work. The GINIplus study team wishes to acknowledge the

following: Helmholtz Zentrum Muenchen - German Research Center for Environmental Health, Institute of Epidemiology I, Munich (Heinrich J, Brüske I, Schulz H, Standl M, Thiering E, Tiesler CMT, Chen C-M, Schnappinger M); Department of Pediatrics, Marien-Hospital, Wesel (Berdel D, von Berg A); Department of Pediatrics, Ludwig Maximilians University, Munich (Koletzko S); Department of Pediatrics, Technical University, Munich (Bauer CP, Hoffmann U); IUF – Leibniz Research Institute for Environmental Medicine, Düsseldorf (Krämer U, Link E, Cramer C). The LISApplus study team wishes to acknowledge the following: Helmholtz Zentrum Muenchen - German Research Center for Environment and Health, Institute of Epidemiology I, Neuherberg (Heinrich J, Brüske I, Schulz H, Standl M, Thiering E, Tiesler CMT, Chen C-M, Schnappinger M); Department of Pediatrics, Marien-Hospital, Wesel (von Berg A); Bad Honnef (Schaaf B); UFZ-Centre for Environmental Research Leipzig-Halle, Department of Environmental Immunology (Lehmann I); IUF – Leibniz Research Institute for Environmental Medicine, Düsseldorf (Krämer U); Department of Pediatrics, Technical University, Munich (Bauer CP, Hoffmann U).

*Infancia y media ambiente project (INMA)*

This study was funded by grants from Instituto de Salud Carlos III [CB06/02/0041, G03/176, FIS PI041436, PI081151, PI041705, PI061756, PI091958, PS09/00432, and FIS-FEDER: PI03/1615, PI04/1509, PI04/1112, PI04/1931 , PI05/1079, PI05/1052, PI06/1213, PI07/0314, PI09/02647, PI11/01007, PI11/02591, PI11/02038, PI13/1944, PI13/2032, PI14/00891, PI14/01687, and Miguel Servet-FEDER (MS13/00054 and MS11/0178)], Spanish Ministry of Science and Innovation (SAF2008-00357), European Commission (ENGAGE project and grant agreement HEALTH-F4-2007-201413, HEALTH.2010.2.4.5-1, FP7-ENV-2011 cod 282957), Fundació La

Marató de TV3, Generalitat de Catalunya-CIRIT 1999SGR 00241 and Conselleria de Sanitat Generalitat Valenciana. Part of the DNA extractions and genotyping was performed at the Spanish National Genotyping Centre (CEGEN-Barcelona). The authors are grateful to Silvia Fochs, Anna Sànchez, Maribel López, Nuria Pey, Muriel Ferrer, Amparo Quiles, Sandra Pérez, Gemma León, Elena Romero, Maria Andreu, Nati Galiana, Maria Dolores Climent, Amparo Cases and Cristina Capo for their assistance in contacting the families and administering the questionnaires. The authors would particularly like to thank all the participants for their generous collaboration. Dr. Xavier Estivill is funded by GRC AGAUR, Generalitat de Catalunya. 2014 SGR-1138. Dr. M. Guxens was supported by grant from Instituto de Salud Carlos III (MS13/00054). A full roster of the INMA Project Investigators can be found at [http://www.proyectoinma.org/presentacion-inma/listado-investigadores/en\\_listado-investigadores.html](http://www.proyectoinma.org/presentacion-inma/listado-investigadores/en_listado-investigadores.html).

## References

1. van Eijsden M, Vrijkotte TGM, Gemke RBJ, van der Wal MF. Cohort Profile: The Amsterdam Born Children and their Development (ABCD) Study. *Int J Epidemiol* 2011;40:1176-86.
2. Lane JA, Noble JA. Maximizing deoxyribonucleic acid yield from dried blood spots. *Journal of Diabetes Science & Technology* 2010;4:250-4.
3. Waumans RC, Terwee CB, Van den Berg G, Knol DL, Van Litsenburg RRL, Gemke RBJ. Sleep and Sleep Disturbance in Children: Reliability and Validity of the Dutch Version of the Child Sleep Habits Questionnaire. *Sleep* 2010;33:841-5.
4. Boyd A, Golding J, Macleod J, et al. Cohort Profile: the 'children of the 90s'--the index offspring of the Avon Longitudinal Study of Parents and Children. *Int J Epidemiol* 2013;42:111-27.
5. Sunyer J, Esnaola M, Alvarez-Pedrerol M, et al. Association between Traffic-Related Air Pollution in Schools and Cognitive Development in Primary School Children: A Prospective Cohort Study. *Plos Med* 2015;12.
6. Kruithof CJ, Kooijman MN, van Duijn CM, et al. The Generation R Study: Biobank update 2015. *Eur J Epidemiol* 2014;29:911-27.
7. Medina-Gomez C, Felix JF, Estrada K, et al. Challenges in conducting genome-wide association studies in highly admixed multi-ethnic populations: the Generation R Study. *Eur J Epidemiol* 2015;30:317-30.
8. Jansen PW, Saridjan NS, Hofman A, Jaddoe VWV, Verhulst FC, Tiemeier H. Does Disturbed Sleeping Precede Symptoms of Anxiety or Depression in Toddlers? The Generation R Study. *Psychosom Med* 2011;73:242-9.

9. Strandberg TE, Jarvenpaa AL, Vanhanen H, McKeigue PM. Birth outcome in relation to licorice consumption during pregnancy. *Am J Epidemiol* 2001;153:1085-8.
10. Raikkonen K, Seckl JR, Heinonen K, et al. Maternal prenatal licorice consumption alters hypothalamic-pituitary-adrenocortical axis function in children. *Psychoneuroendocrinology* 2010;35:1587-93.
11. Raikkonen K, Pesonen AK, Heinonen K, et al. Maternal licorice consumption and detrimental cognitive and psychiatric outcomes in children. *Am J Epidemiol* 2009;170:1137-46.
12. von Berg A, Filipiak-Pittroff B, Kramer U, et al. Allergies in high-risk schoolchildren after early intervention with cow's milk protein hydrolysates: 10-year results from the German Infant Nutritional Intervention (GINI) study. *J Allergy Clin Immunol* 2013;131:1565-73.
13. Heinrich J, Bolte G, Holscher B, et al. Allergens and endotoxin on mothers' mattresses and total immunoglobulin E in cord blood of neonates. *Eur Respir J* 2002;20:617-23.
14. Guxens M, Ballester F, Espada M, et al. Cohort Profile: The INMA-INfancia y Medio Ambiente-(Environment and Childhood) Project. *Int J Epidemiol* 2012;41:930-40.
15. Marchini J, Howie B. Genotype imputation for genome-wide association studies. *Nat Rev Genet* 2010;11:499-511.
16. Howie BN, Donnelly P, Marchini J. A Flexible and Accurate Genotype Imputation Method for the Next Generation of Genome-Wide Association Studies. *Plos Genet* 2009;5.
17. Li Y, Willer CJ, Ding J, Scheet P, Abecasis GR. MaCH: Using Sequence and Genotype Data to Estimate Haplotypes and Unobserved Genotypes. *Genet Epidemiol* 2010;34:816-34.
18. Estrada K, Abuseiris A, Grosveld FG, Uitterlinden AG, Knoch TA, Rivadeneira F. GRIMP: a web- and grid-based tool for high-speed analysis of large-scale genome-wide association using imputed data. *Bioinformatics* 2009;25:2750-2.

19. Gottlieb DJ, Hek K, Chen TH, et al. Novel loci associated with usual sleep duration: the CHARGE Consortium Genome-Wide Association Study. *Mol Psychiatry* 2015;20:1232-9.
20. Bradfield JP, Taal HR, Timpson NJ, et al. A genome-wide association meta-analysis identifies new childhood obesity loci. *Nat Genet* 2012;44:526-31.
21. Morris AP, Voight BF, Teslovich TM, et al. Large-scale association analysis provides insights into the genetic architecture and pathophysiology of type 2 diabetes. *Nat Genet* 2012;44:981-90.
22. Saxena R, Hivert MF, Langenberg C, et al. Genetic variation in GIPR influences the glucose and insulin responses to an oral glucose challenge. *Nat Genet* 2010;42:142-U75.
23. Sklar P, Ripke S, Scott LJ, et al. Large-scale genome-wide association analysis of bipolar disorder identifies a new susceptibility locus near ODZ4. *Nat Genet* 2011;43:977-U162.
24. Sullivan PF, Daly MJ, Ripke S, et al. A mega-analysis of genome-wide association studies for major depressive disorder. *Mol Psychiatr* 2013;18:497-511.
25. Ripke S, Neale BM, Corvin A, et al. Biological insights from 108 schizophrenia-associated genetic loci. *Nature* 2014;511:421-7.
26. Mick E, Todorov A, Smalley S, et al. Family-Based Genome-Wide Association Scan of Attention-Deficit/Hyperactivity Disorder. *J Am Acad Child Psy* 2010;49:898-905.
